# Supplementary material for: Molecular dynamics simulations reveal disruptive self-assembly in dynamic peptide libraries
Source: Royal Society of Chemistry journal article supplement (doi:10.1039/c7ob01268c), 2017-01-01
Supplement: c7ob01268c1.pdf [file c7ob01268c1.pdf]

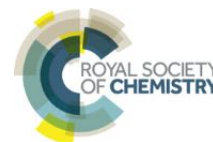

Journal Name

ARTICLE

Electronic Supplementary Information for:

**Molecular Dynamics Simulations Reveal Disruptive Self-Assembly  
in Dynamic Peptide Libraries**

Received 00th January 20xx,  
Accepted 00th January 20xx

DOI: 10.1039/x0xx00000x

[www.rsc.org/](http://www.rsc.org/)

I. R. Sasselli,<sup>a</sup> I. P. Moreira,<sup>a</sup> R. V. Ulijn<sup>abcd</sup> and T. Tuttle<sup>\*a</sup>

<sup>a</sup> Department of Pure & Applied Chemistry, WestCHEM, University of Strathclyde,  
295 Cathedral Street, Glasgow, G1 1XL, UK E-mail: [tell.tuttle@strath.ac.uk](mailto:tell.tuttle@strath.ac.uk)

<sup>b</sup> Advanced Science Research Center (ASRC), City University of New York (CUNY), 85  
St Nicholas Terrace, New York, NY 10031, USA.

<sup>c</sup> Hunter College, Department of Chemistry and Biochemistry, 695 Park Avenue,  
New York, NY 10065, USA.

<sup>d</sup> PhD Program in Chemistry, The Graduate Center of the City University of New  
York, New York, NY 10016

Electronic Supplementary Information (ESI) available: Extra simulation snapshots.  
See DOI: 10.1039/x0xx00000x

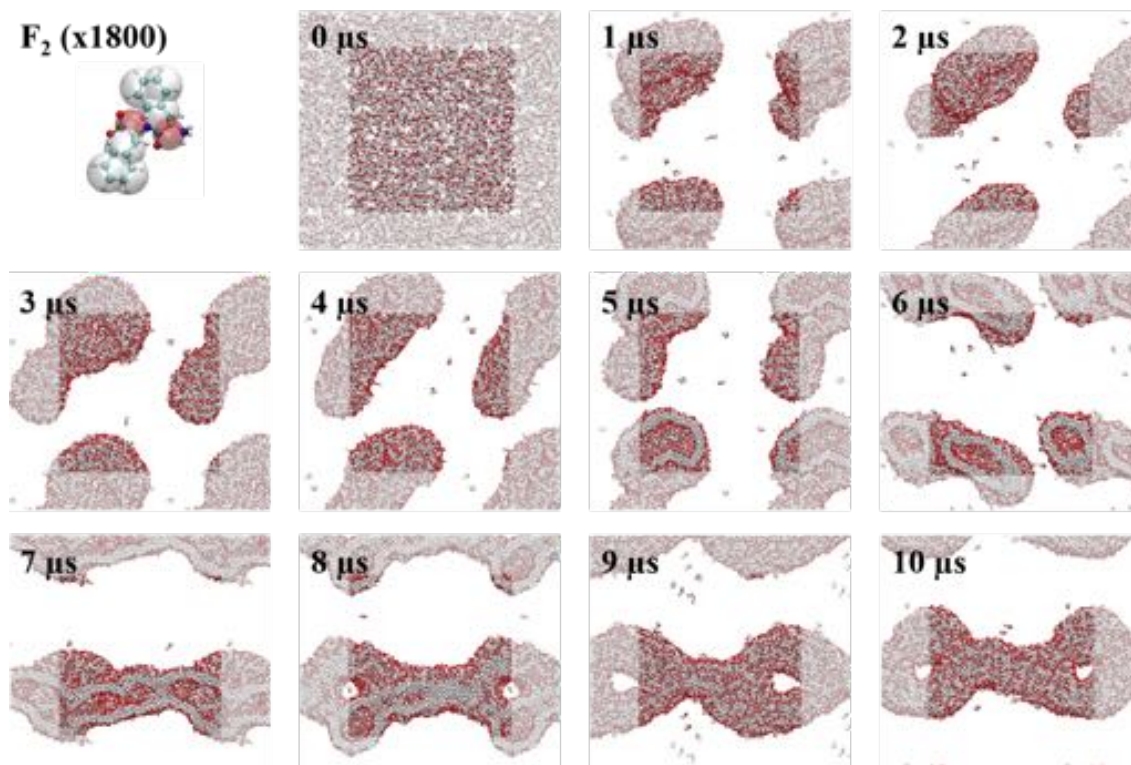

Figure S1. F<sub>2</sub> atomistic to CG representation and CG simulation snapshots every microsecond. System composed of 1800 molecules with backbone beads in red and side chain beads in white. Water removed for clarity.

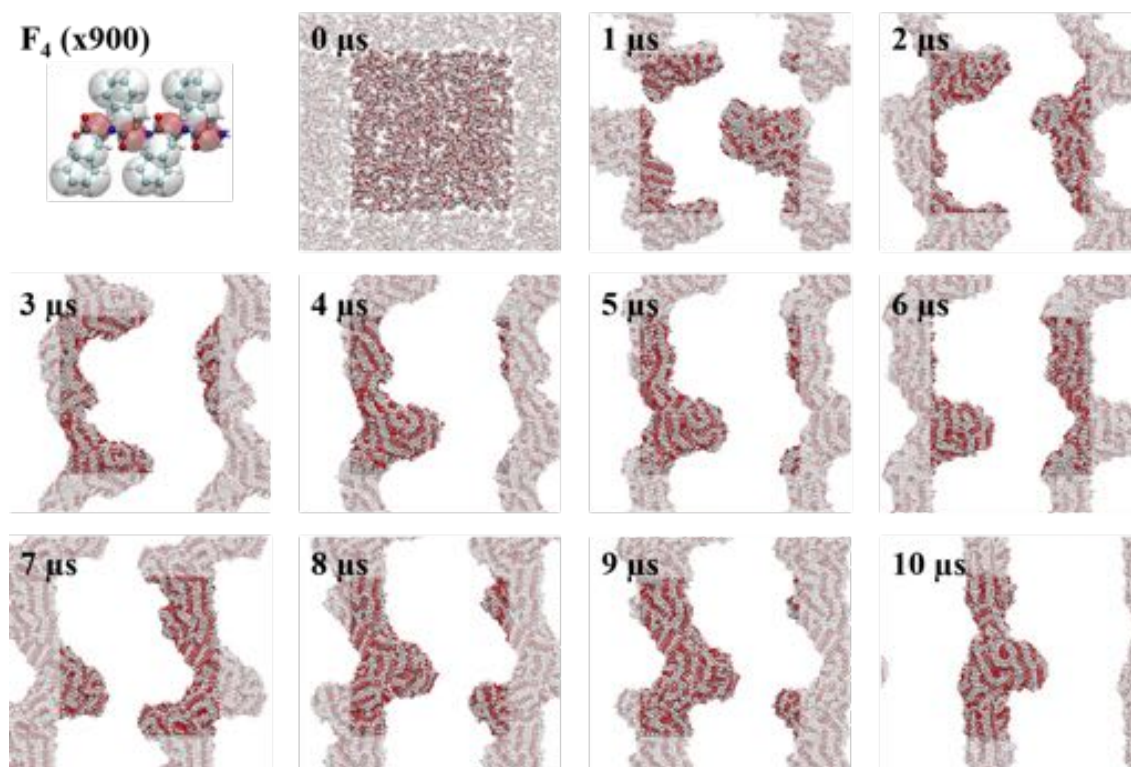

Figure S2. F<sub>4</sub> atomistic to CG representation and CG simulation snapshots every microsecond. System composed of 900 molecules with backbone beads in red and side chain beads in white. Water removed for clarity.



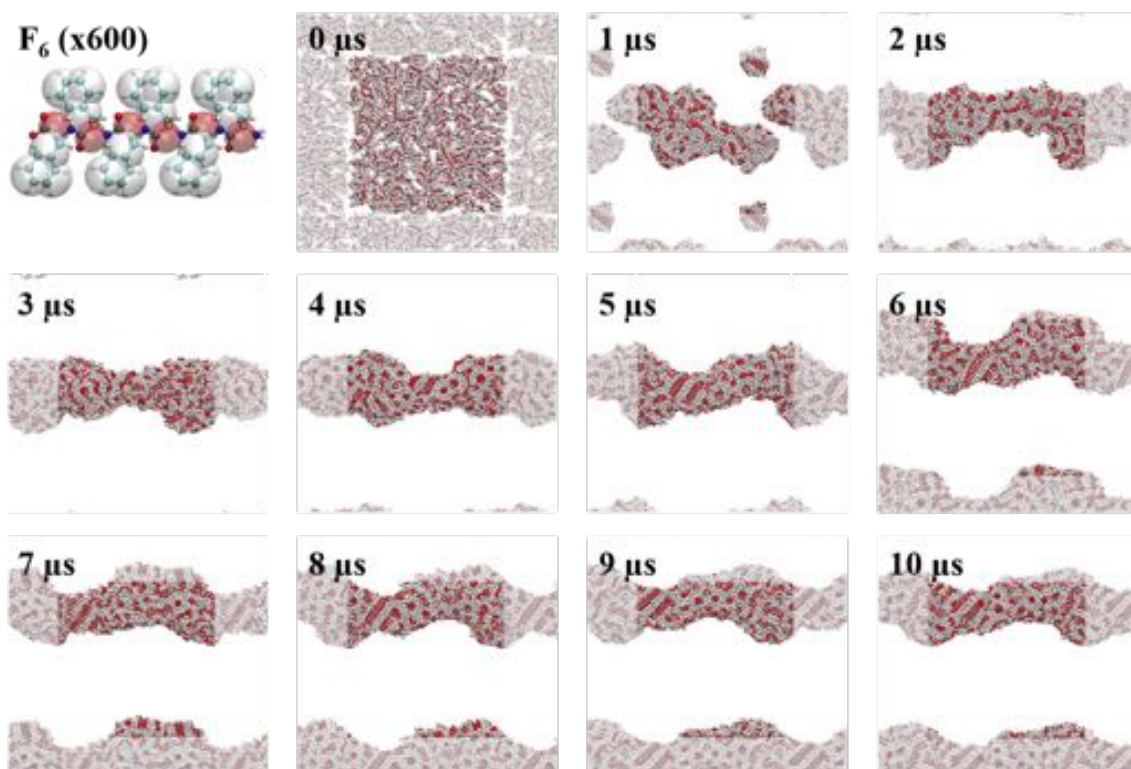

Figure S3. F<sub>6</sub> atomistic to CG representation and CG simulation snapshots every microsecond. System composed of 600 molecules with backbone beads in red and side chain beads in white. Water removed for clarity.

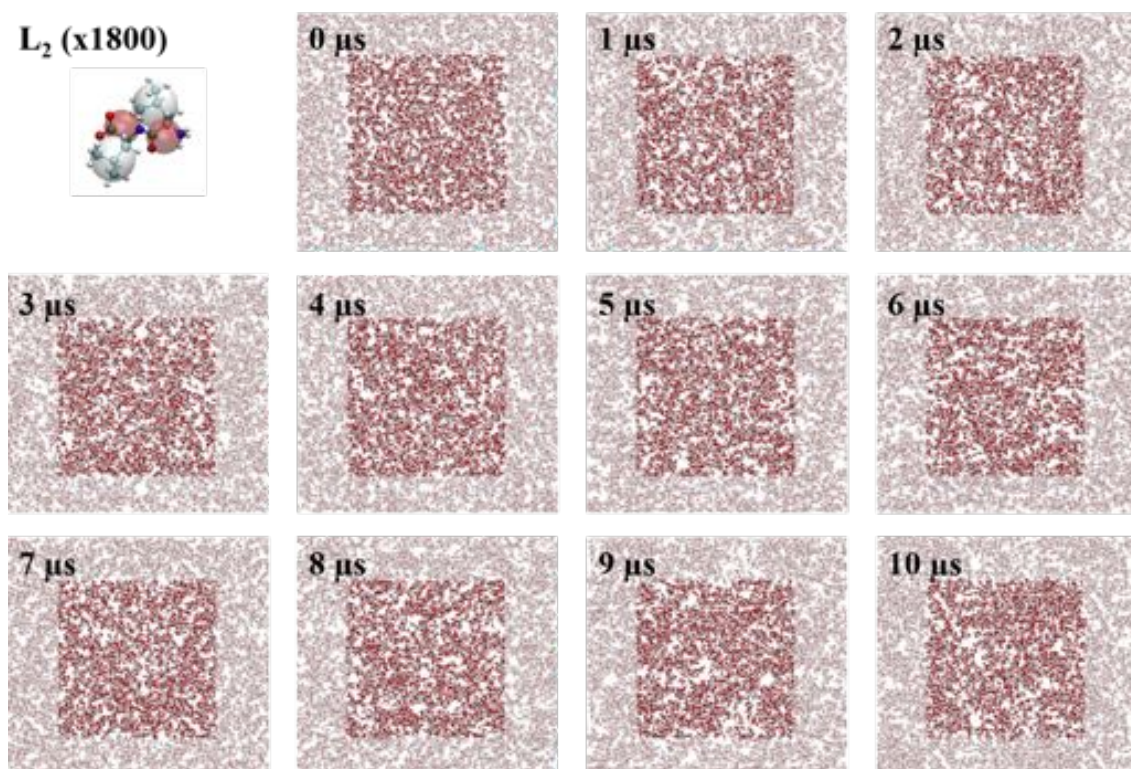

Figure S4. L<sub>2</sub> atomistic to CG representation and CG simulation snapshots every microsecond. System composed of 1800 molecules with backbone beads in red and side chain beads in white. Water removed for clarity.

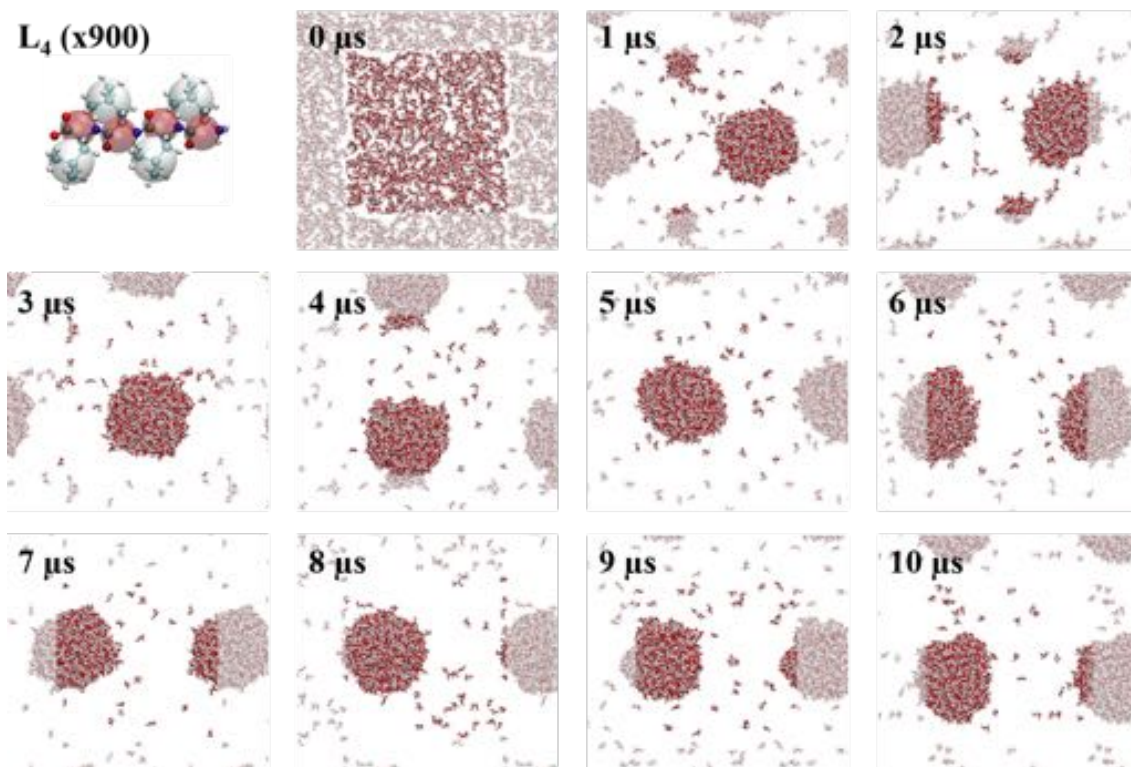

Figure S5. L<sub>4</sub> atomistic to CG representation and CG simulation snapshots every microsecond. System composed of 900 molecules with backbone beads in red and side chain beads in white. Water removed for clarity.

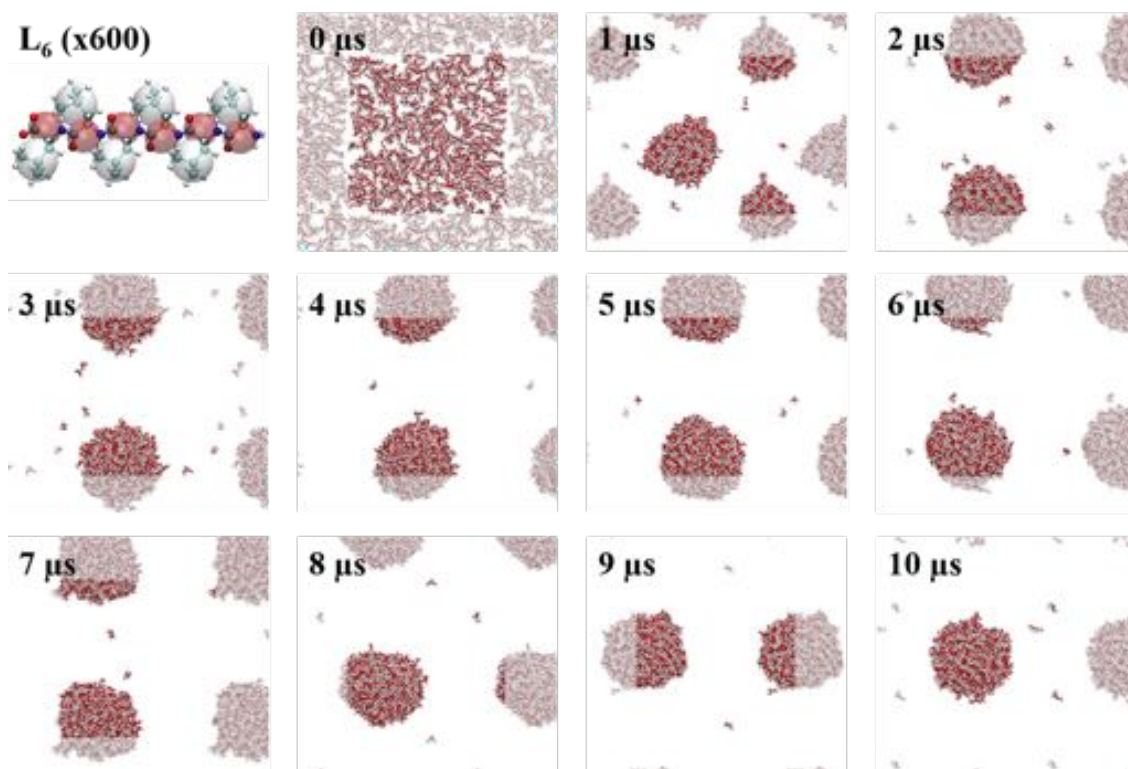

Figure S6. L<sub>6</sub> atomistic to CG representation and CG simulation snapshots every microsecond. System composed of 600 molecules with backbone beads in red and side chain beads in white. Water removed for clarity.



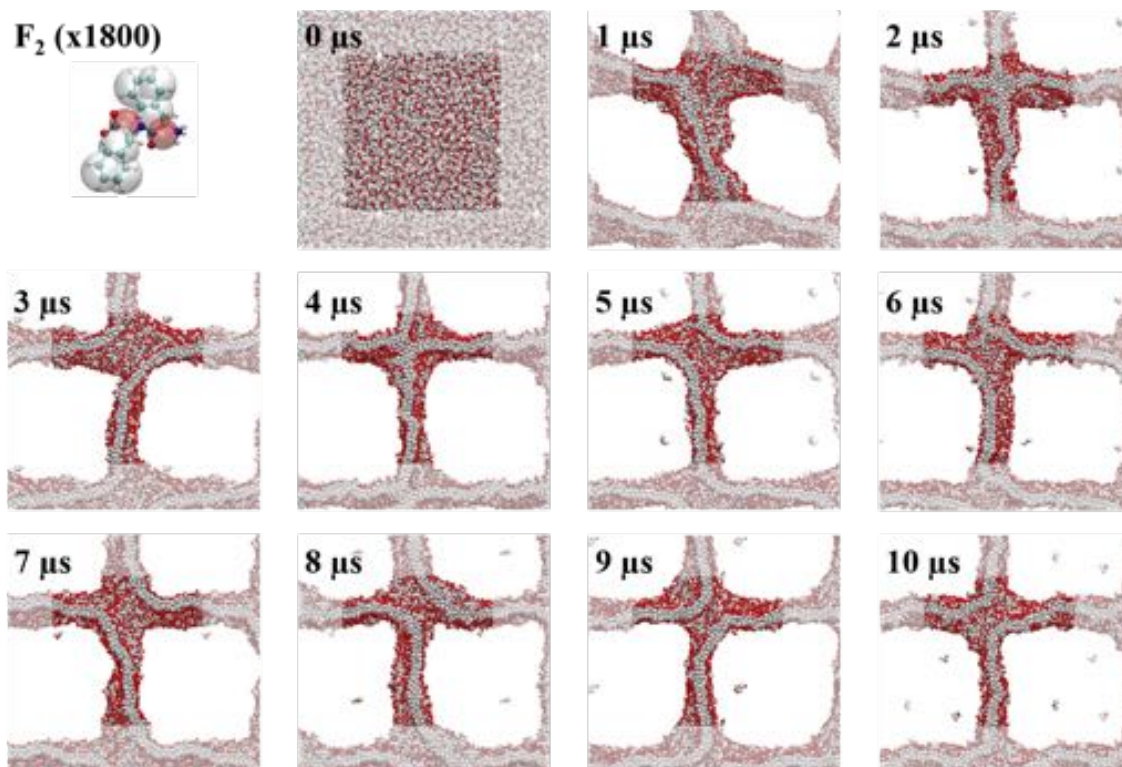

Figure S7. F<sub>2</sub> atomistic to CG representation and snapshots of the concentrated (half volume than in Figure S1) CG simulation, every microsecond from top view. System composed of 1800 molecules with backbone beads in red and side chain beads in white. Water removed for clarity.

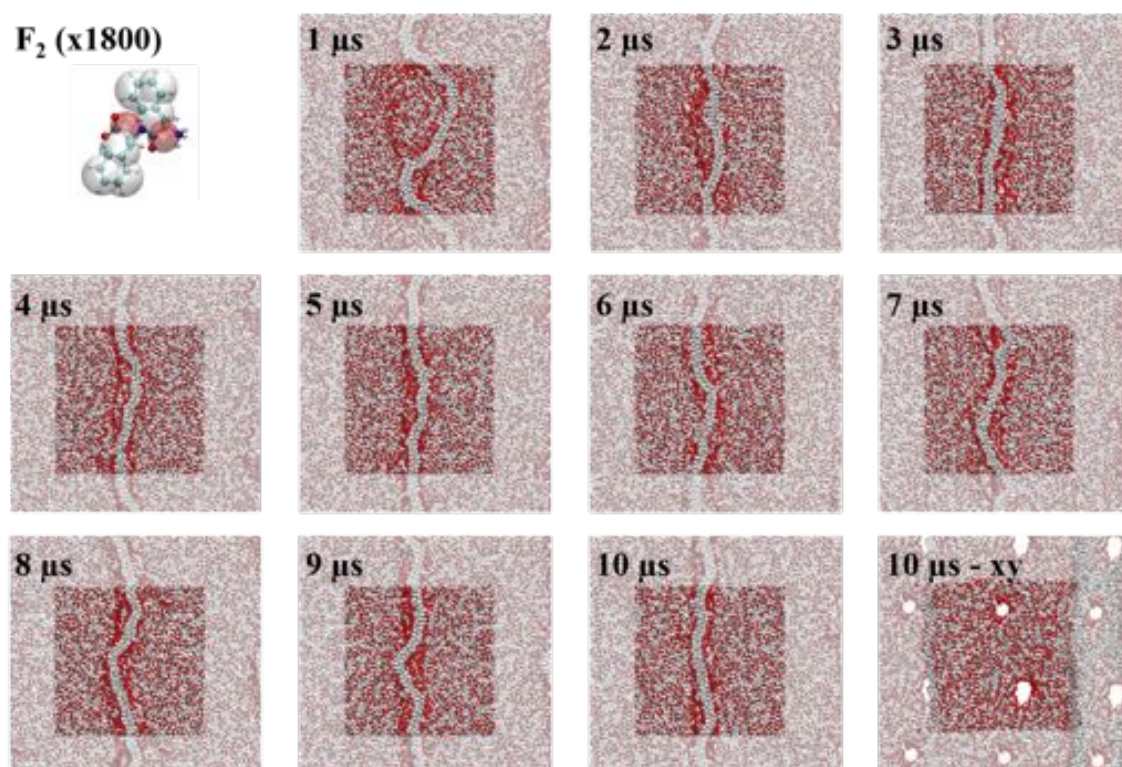

Figure S8. F<sub>2</sub> atomistic to CG representation and snapshots of the concentrated (half volume than in Figure S1) CG simulation, every microsecond from side view. System composed of 1800 molecules with backbone beads in red and side chain beads in white. 10  $\mu$ s – xy is taken from the xy-diagonal to show the holes in the junction of the two bilayers that can be seen in Figure S7. Water removed for clarity.



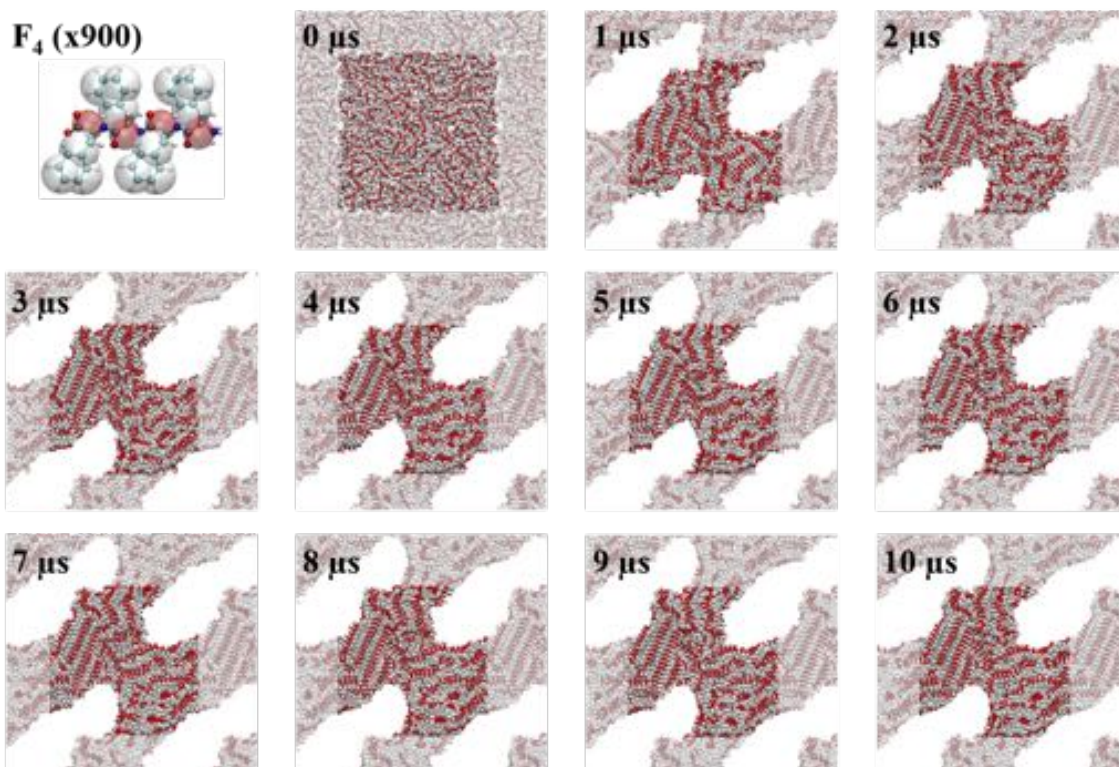

Figure S9. F<sub>4</sub> atomistic to CG representation and snapshots of the concentrated (half volume than in Figure S2) CG simulation, every microsecond. System composed of 900 molecules with backbone beads in red and side chain beads in white. Water removed for clarity.

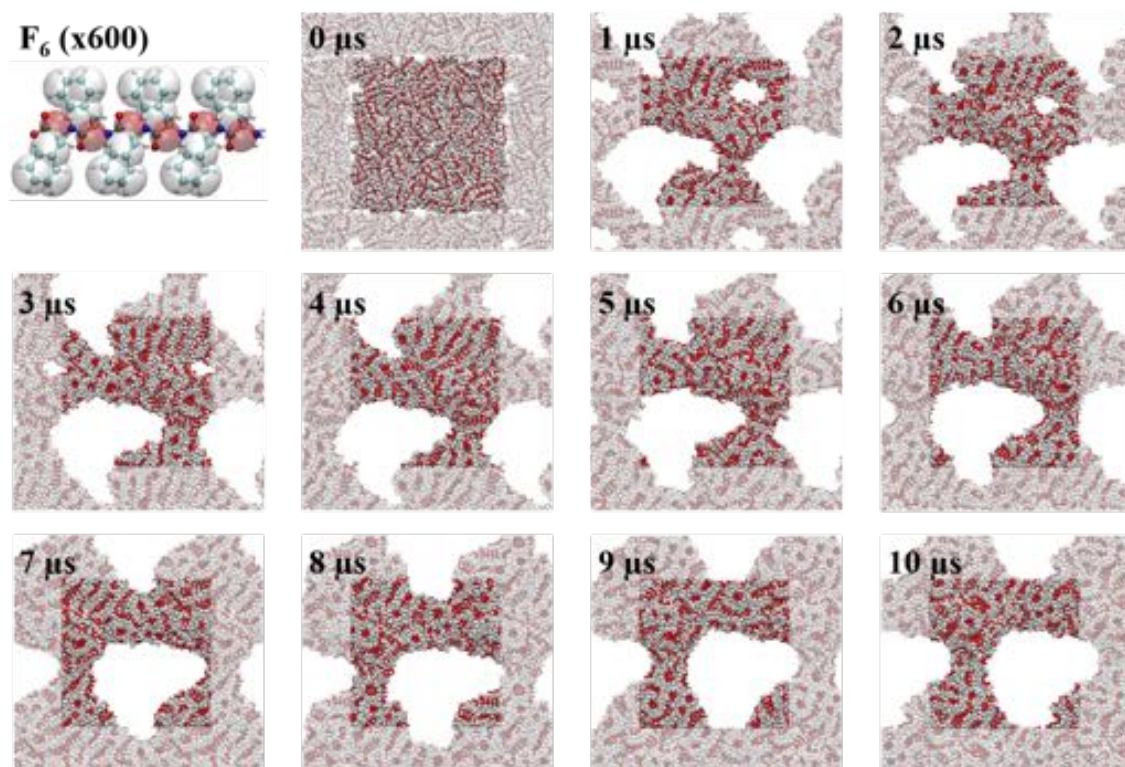

Figure S10. F<sub>6</sub> atomistic to CG representation and snapshots of the concentrated (half volume than in Figure S3) CG simulation, every microsecond. System composed of 600 molecules with backbone beads in red and side chain beads in white. Water removed for clarity.



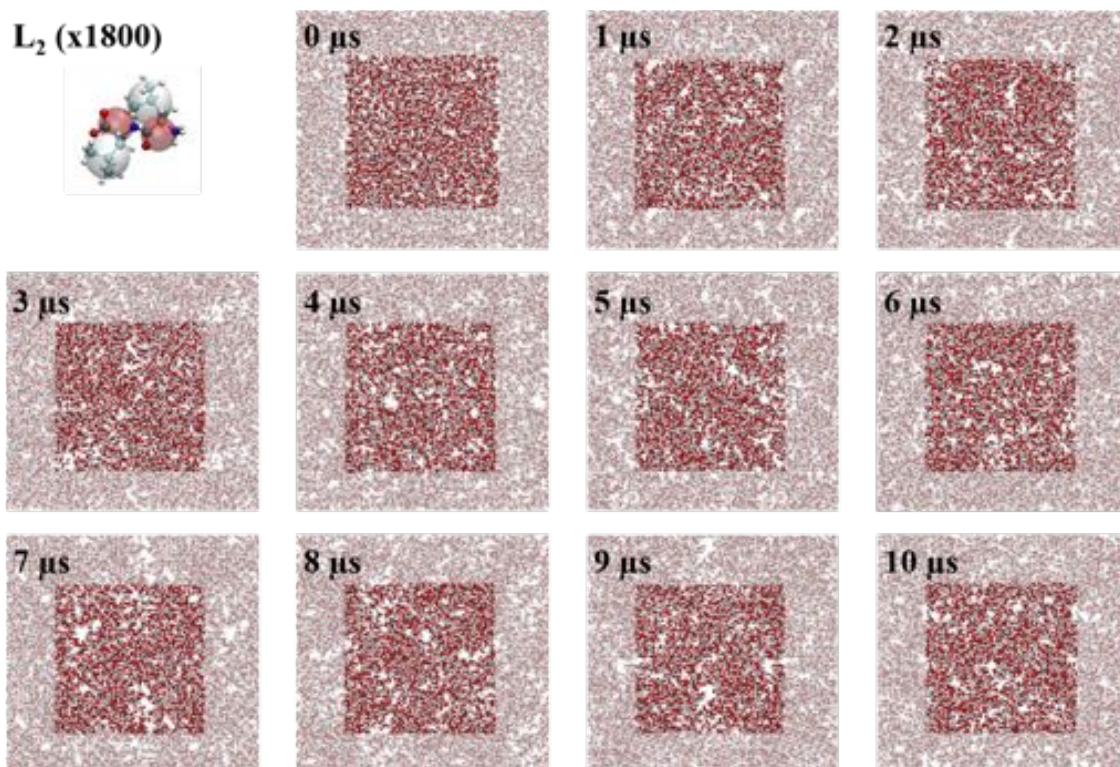

Figure S11. L<sub>2</sub> atomistic to CG representation and snapshots of the concentrated (half volume than in Figure S4) CG simulation, every microsecond. System composed of 1800 molecules with backbone beads in red and side chain beads in white. Water removed for clarity.

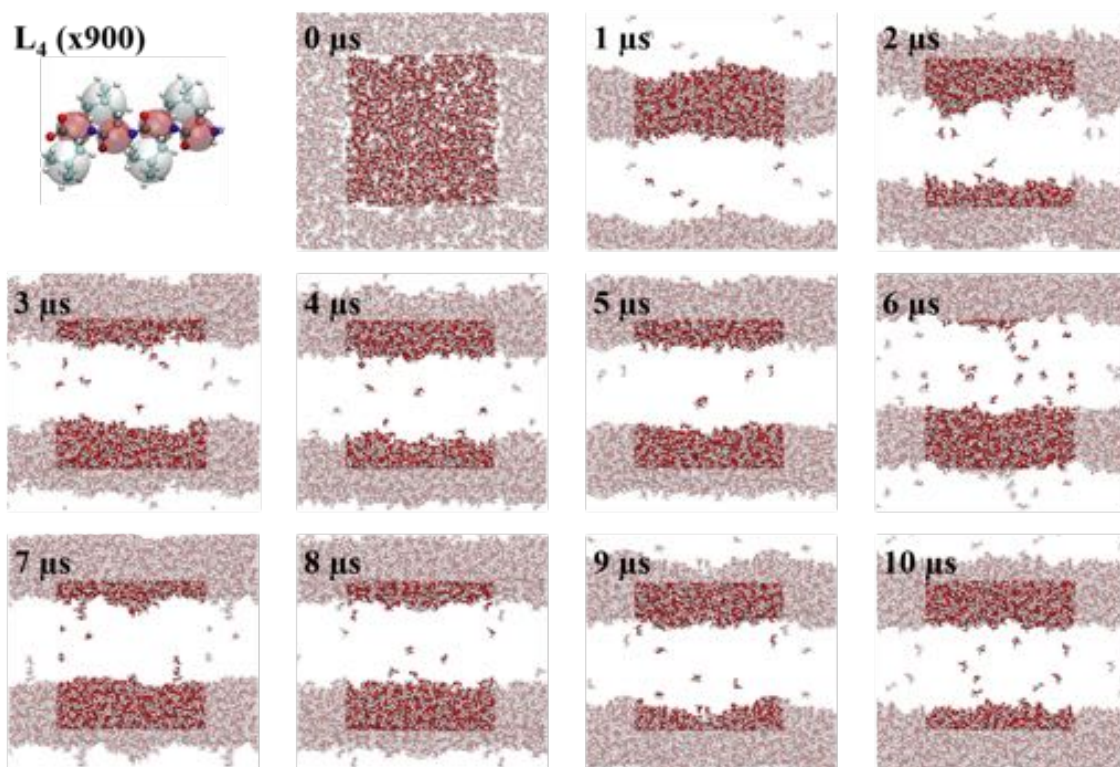

Figure S12. L<sub>4</sub> atomistic to CG representation and snapshots of the concentrated (half volume than in Figure S5) CG simulation, every microsecond. System composed of 900 molecules with backbone beads in red and side chain beads in white. Water removed for clarity.

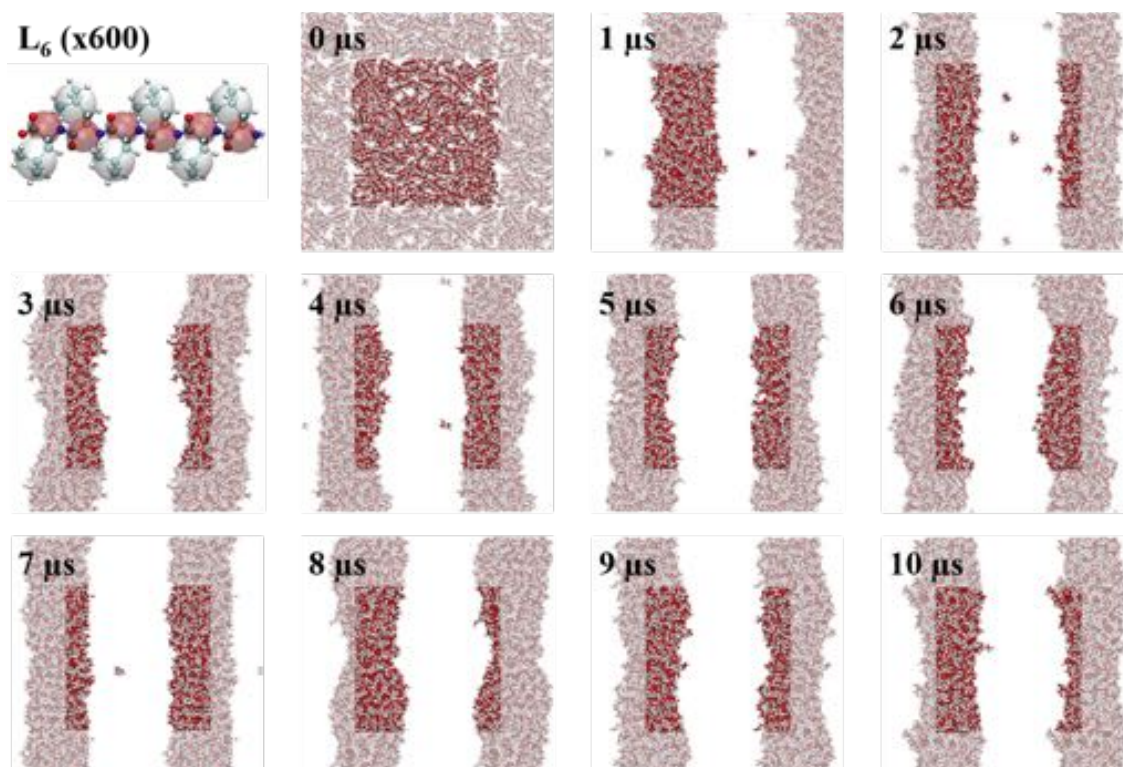

Figure S13.  $L_6$  atomistic to CG representation and snapshots of the concentrated (half volume than in Figure S6) CG simulation, every microsecond. System composed of 600 molecules with backbone beads in red and side chain beads in white. Water removed for clarity.

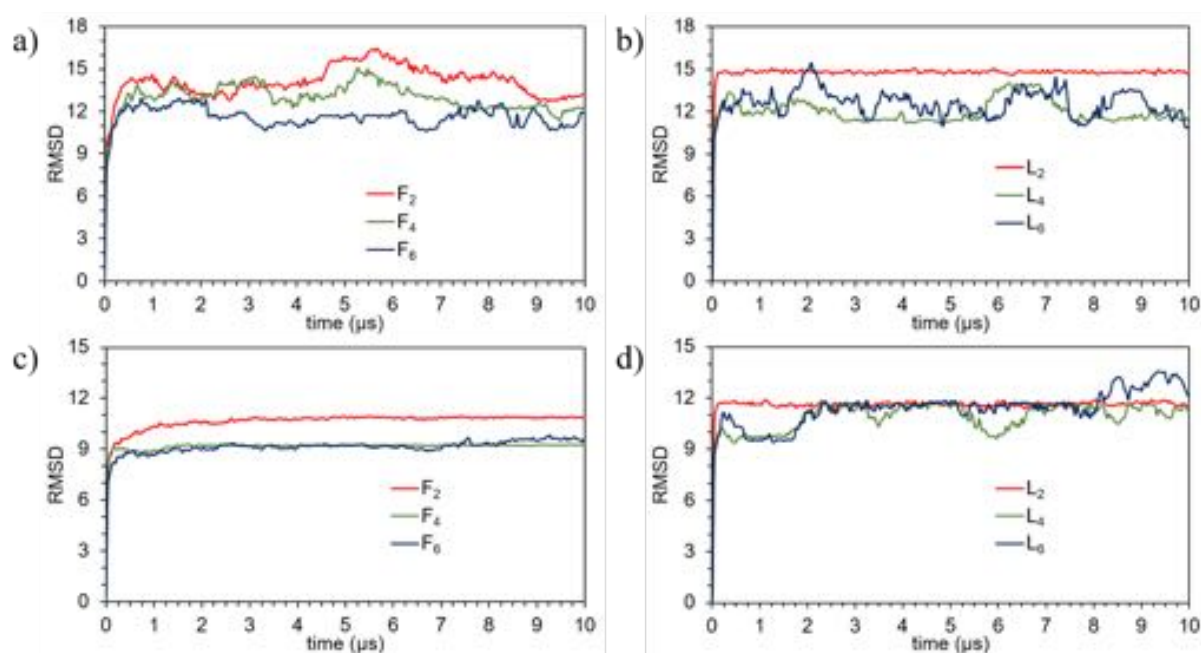

Figure S14. RMSD plots with time for (a-b) diluted systems and (c-d) concentrated systems for the F-peptides (a, c) and L-peptides (b, d).

The plots show the concentrated F systems (Fig. S14 c) to have low movement after 1  $\mu$ s.  $F_6$  shows slightly more fluctuations than  $F_2$  and  $F_4$ . The L concentrated systems (Fig. S14b) show less fluctuations than the diluted (Fig. S14d), due to the nanostructure formation.  $L_2$  shows negligible movement after 0.25  $\mu$ s, but as the pictures show (Fig. S4 and S11) this is because of the averaged movement of the molecules in solution.



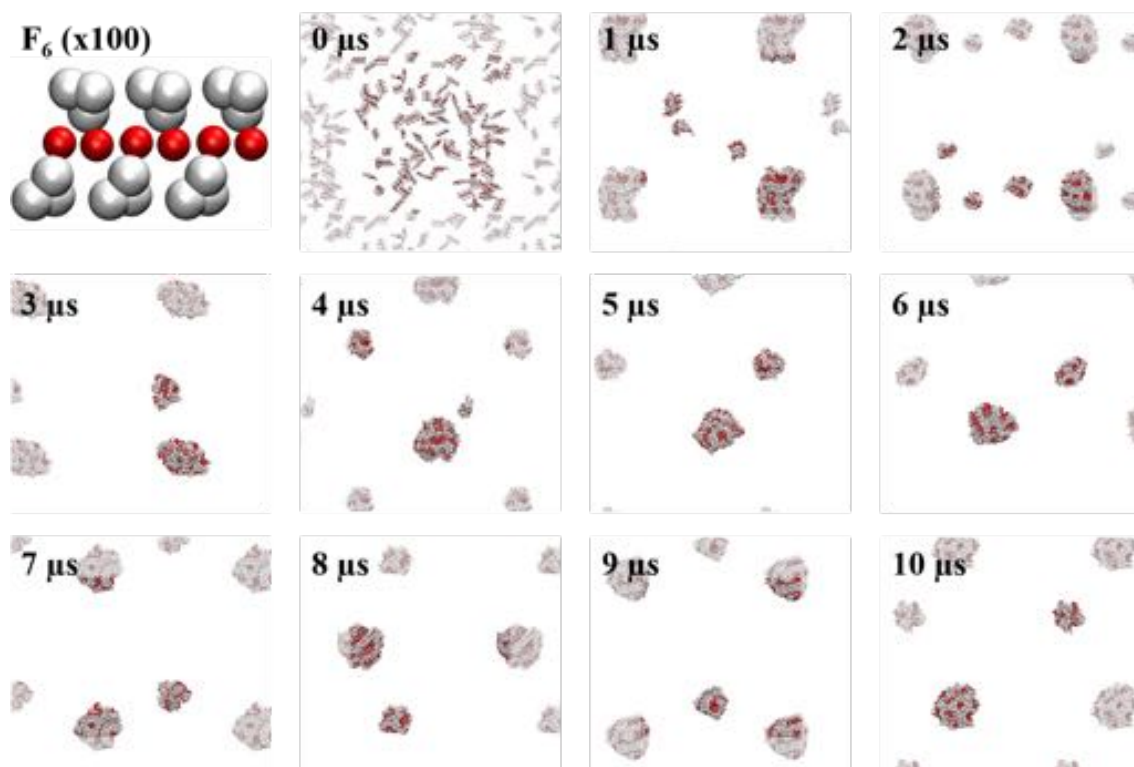

Figure S15.  $F_6$  CG representation and  $F_6^{100}$  CG simulation snapshots every microsecond. System composed of 100 molecules with backbone beads in red and side chain beads in white. Water removed for clarity.

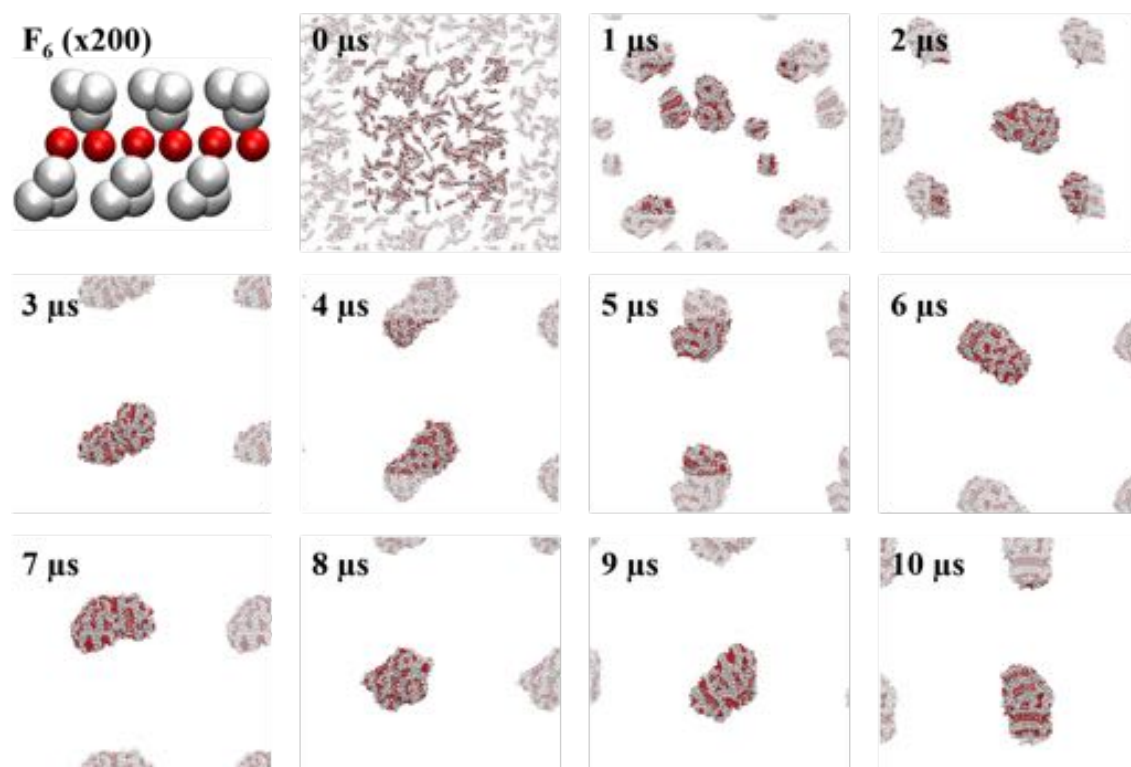

Figure S16.  $F_6$  CG representation and  $F_6^{200}$  CG simulation snapshots every microsecond. System composed of 200 molecules with backbone beads in red and side chain beads in white. Water removed for clarity.

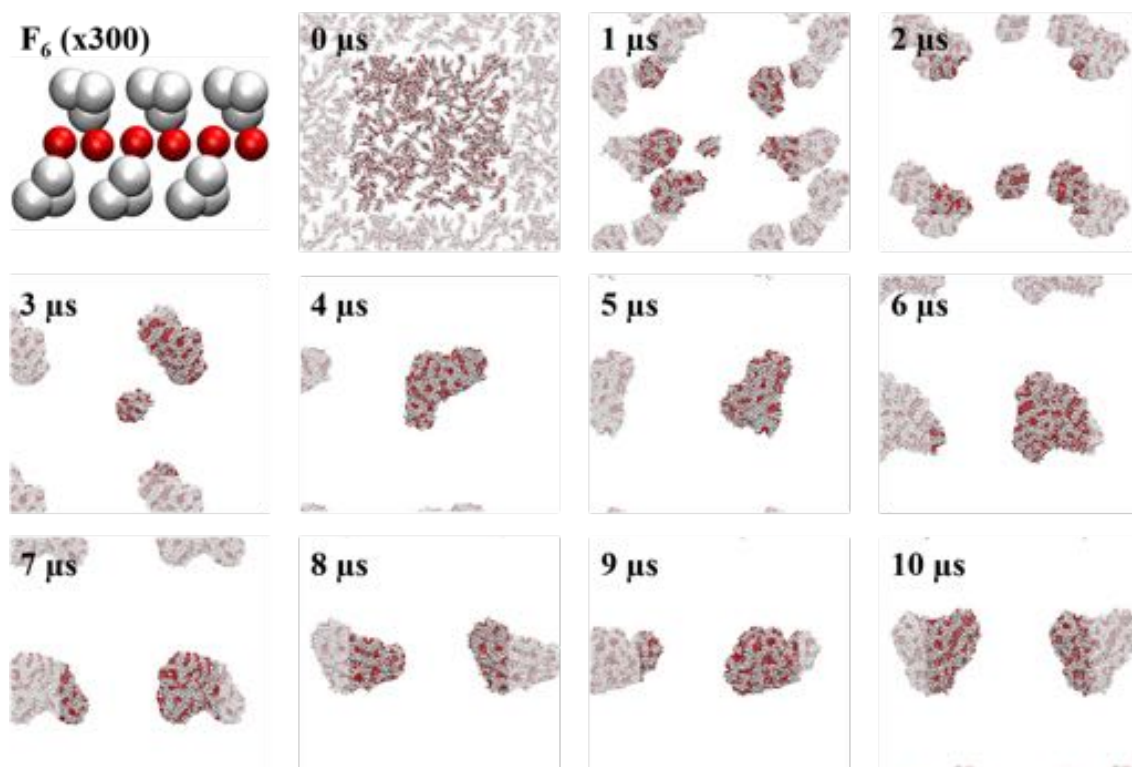

Figure S17.  $F_6$  CG representation and  $F_6^{300}$  CG simulation snapshots every microsecond. System composed of 300 molecules with backbone beads in red and side chain beads in white. Water removed for clarity.

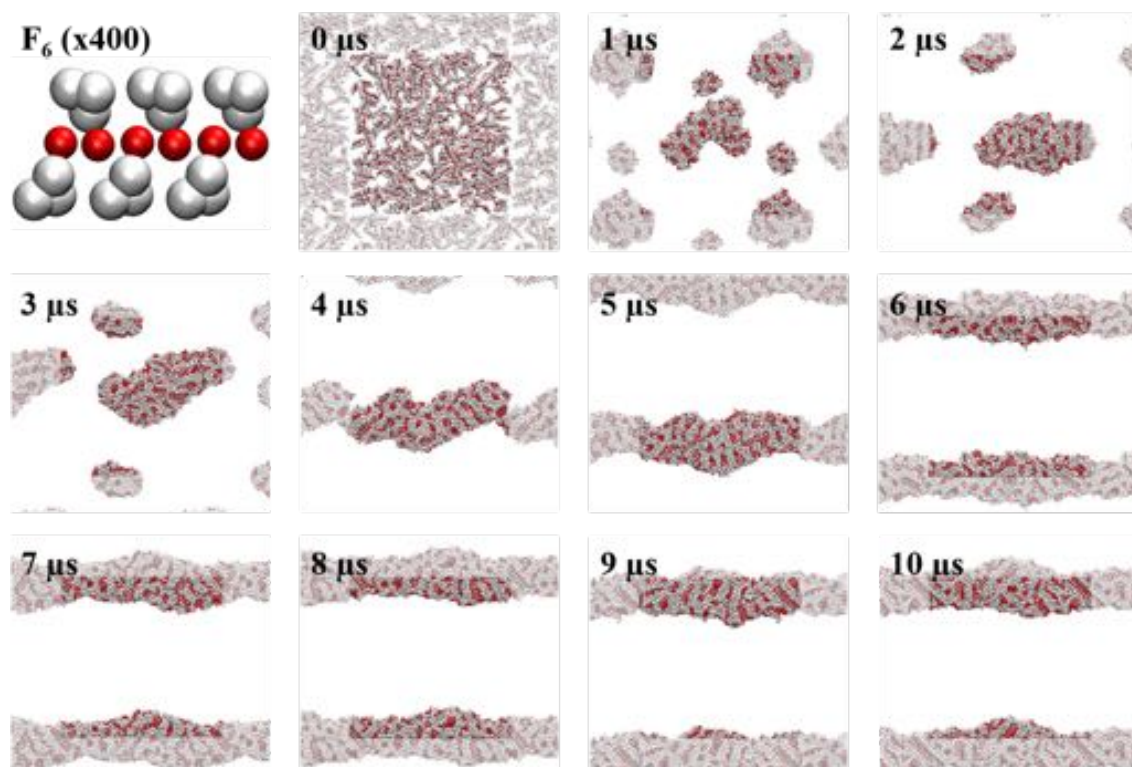

Figure S18.  $F_6$  CG representation and  $F_6^{400}$  CG simulation snapshots every microsecond. System composed of 400 molecules with backbone beads in red and side chain beads in white. Water removed for clarity.



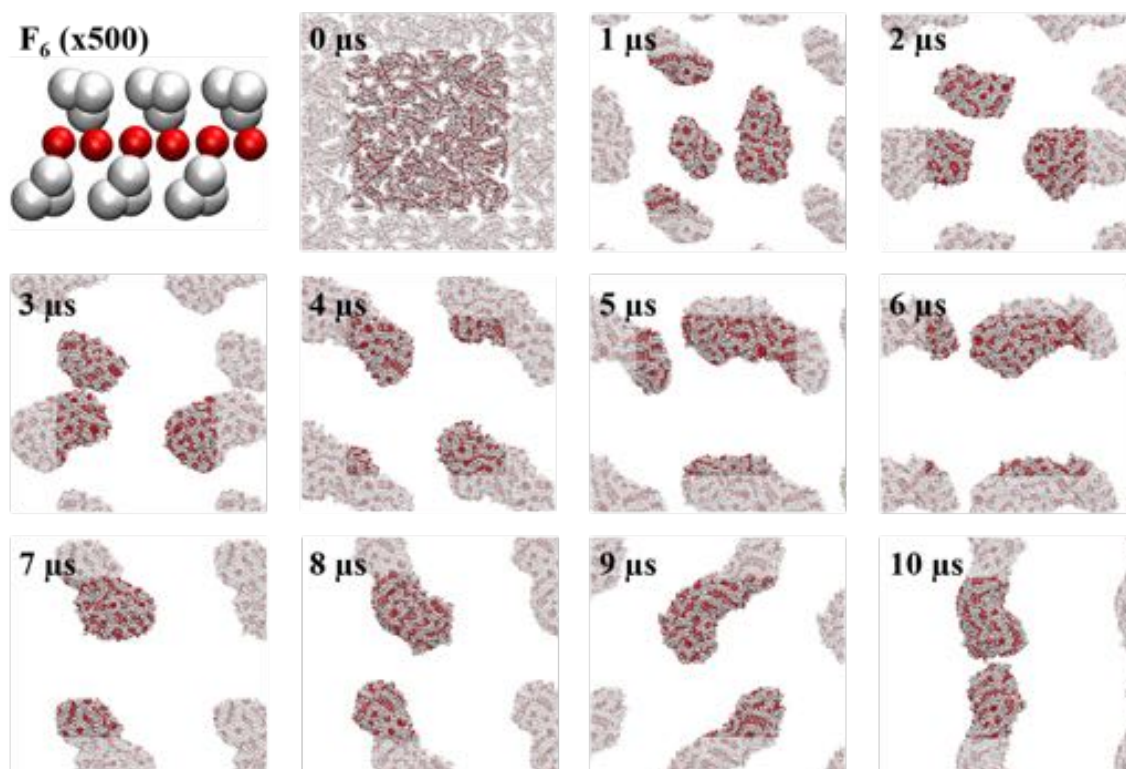

Figure S19.  $F_6$  CG representation and  $F_6^{500}$  CG simulation snapshots every microsecond. System composed of 500 molecules with backbone beads in red and side chain beads in white. Water removed for clarity.

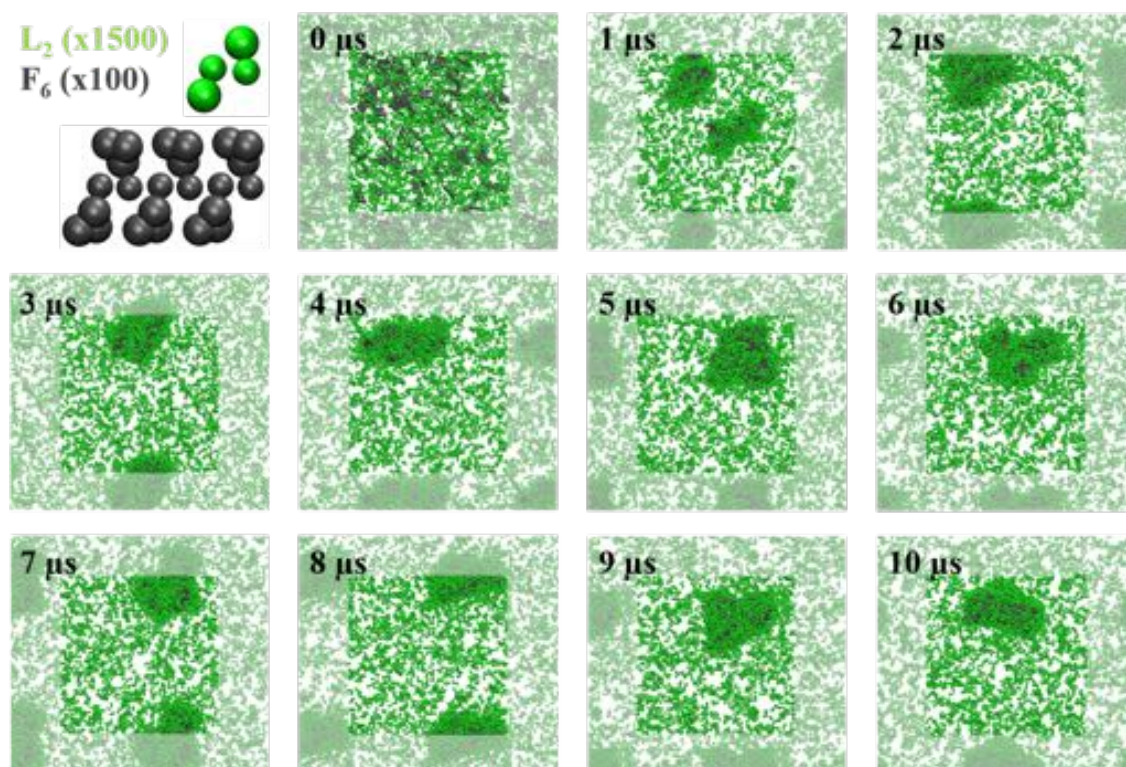

Figure S20.  $L_2$  (green) and  $F_6$  (grey) CG representations and  $F-L^{100-1500}$  CG simulation snapshots every microsecond. System composed of 1500  $L_2$  molecules in green and 100  $F_6$  molecules in grey. Water removed for clarity.



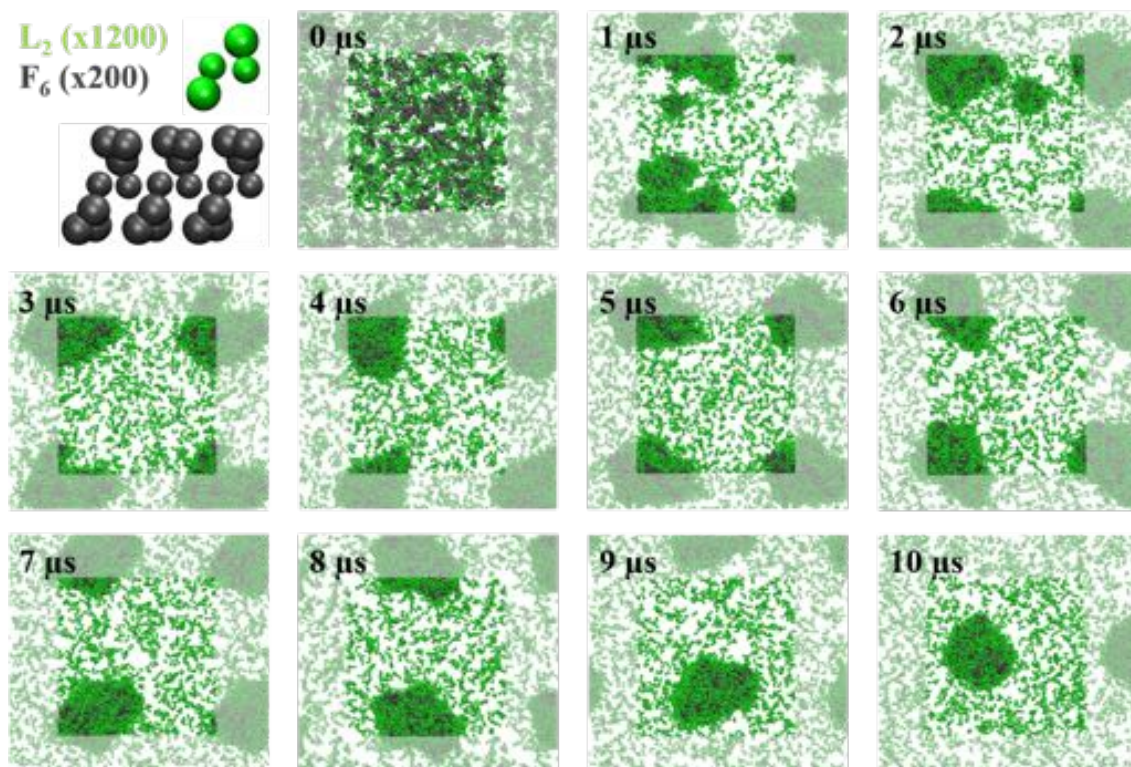

Figure S21.  $L_2$  (green) and  $F_6$  (grey) CG representations and  $F-L^{200-1200}$  CG simulation snapshots every microsecond. System composed of 1200  $L_2$  molecules in green and 200  $F_6$  molecules in grey. Water removed for clarity.

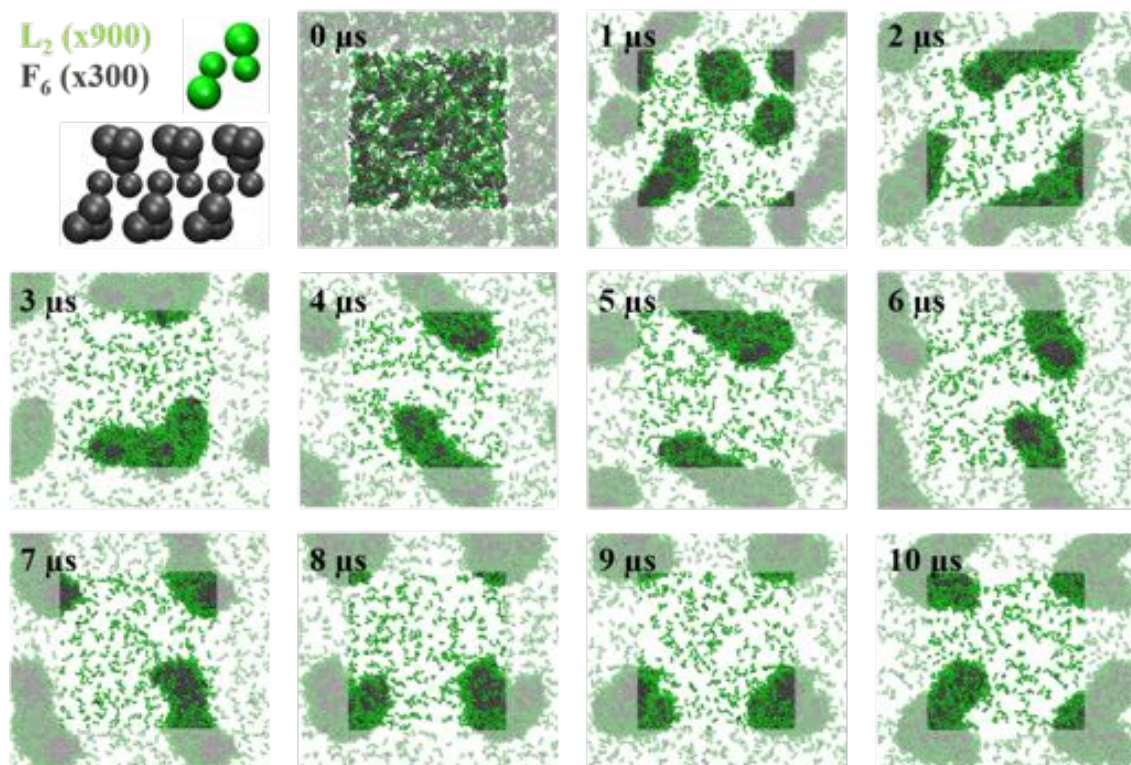

Figure S22.  $L_2$  (green) and  $F_6$  (grey) CG representations and  $F-L^{300-900}$  CG simulation snapshots every microsecond. System composed of 900  $L_2$  molecules in green and 300  $F_6$  molecules in grey. Water removed for clarity.



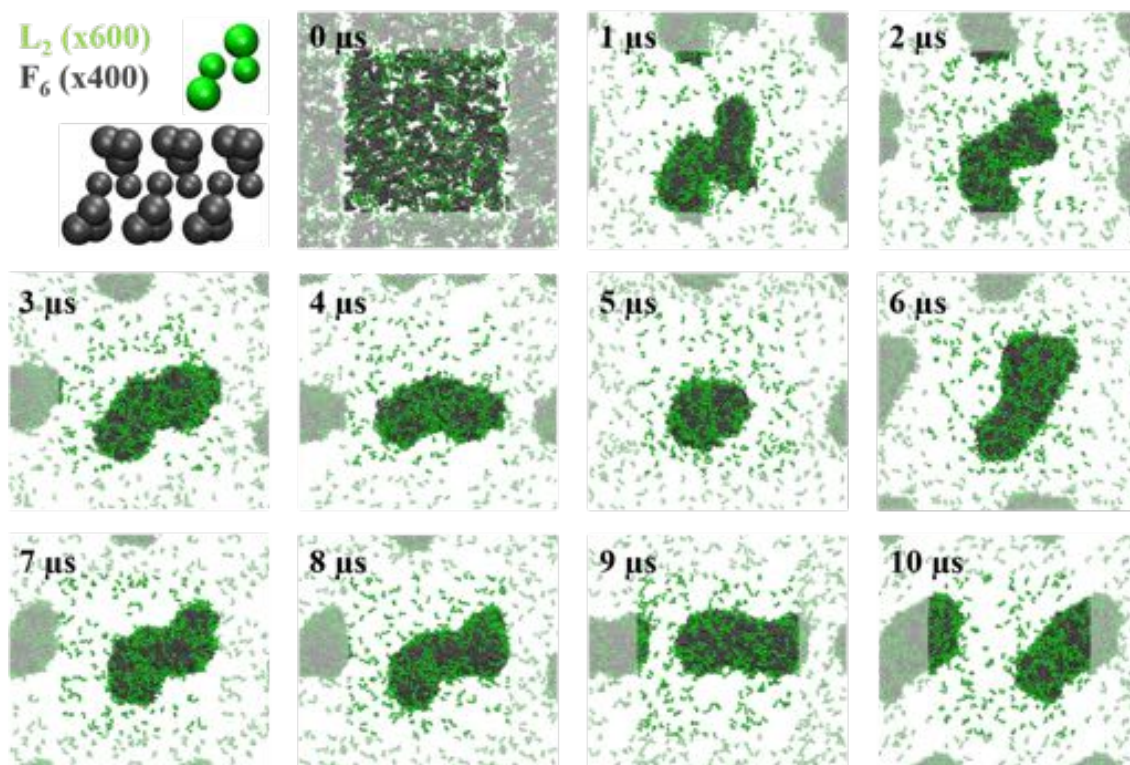

Figure S23.  $L_2$  (green) and  $F_6$  (grey) CG representations and  $F-L^{400-600}$  CG simulation snapshots every microsecond. System composed of 600  $L_2$  molecules in green and 400  $F_6$  molecules in grey. Water removed for clarity.

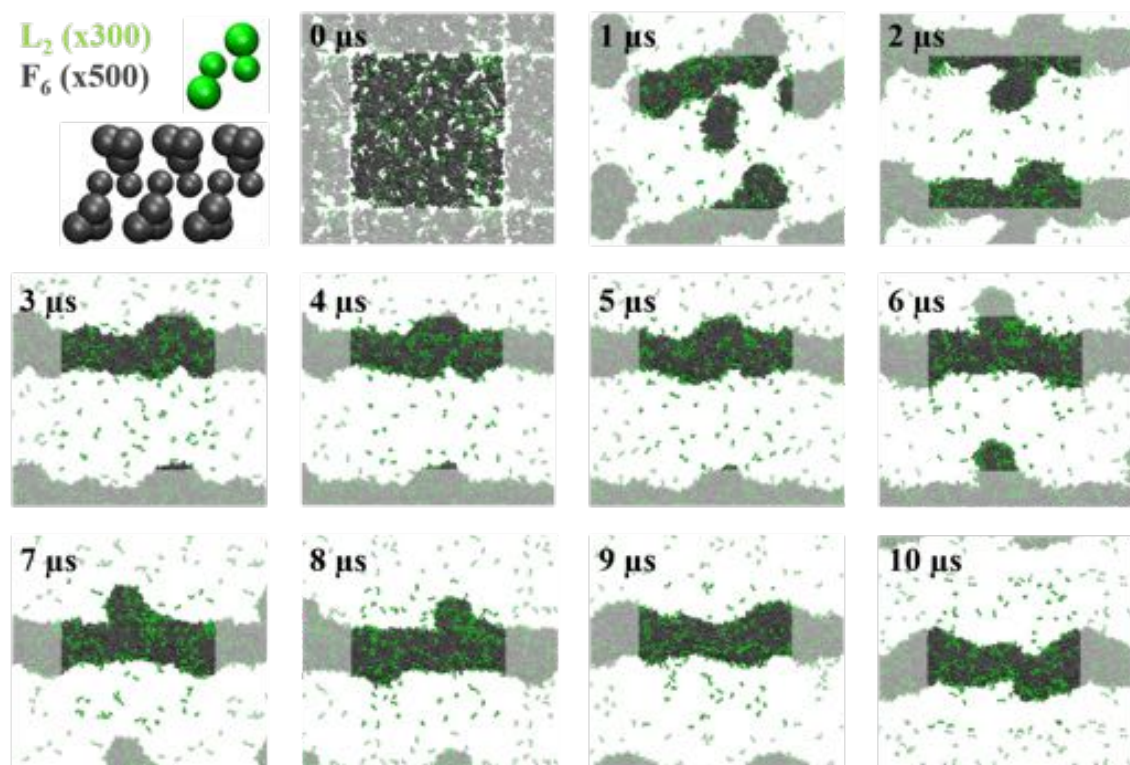

Figure S24.  $L_2$  (green) and  $F_6$  (grey) CG representations and  $F-L^{500-300}$  CG simulation snapshots every microsecond. System composed of 300  $L_2$  molecules in green and 500  $F_6$  molecules in grey. Water removed for clarity.
